# Supplementary material
Source: PubMed Central journal article supplement (PMC3953459)
Supplement: NIHMS525645-supplement-eTable.pdf [file NIHMS525645-supplement-eTable.pdf]

## Supplementary Online Content

Blumenthal JA, Babyak MA, O'Connor C, et al. Effects of Exercise Training on Depressive Symptoms in Patients With Chronic Heart Failure. *JAMA*. 2012;307(3):DOI:10.1001/jama.2012.8720

**eTable.** Detailed Background Demographic and Clinical Characteristics of Sample

**eFigure.** Association Between Change in BDI-II From Baseline to 3 Months and All-Cause Hospitalization or Death After the 3-Month Time Point

This supplementary material has been provided by the authors to give readers additional information about their work.

**eTable. Detailed background demographic and clinical characteristics of sample**

|                                                         | Exercise<br>(N = 1158)       |                        |                        |                              | Usual Care<br>(N = 1164) |                        |                                   |
|---------------------------------------------------------|------------------------------|------------------------|------------------------|------------------------------|--------------------------|------------------------|-----------------------------------|
|                                                         | N with<br>nonmissing<br>data | BDI-II < 14<br>(N=821) | BDI-II > 14<br>(N=337) | All Exercise<br>Participants | BDI-II < 14<br>(N=848)   | BDI-II > 14<br>(N=316) | All Usual<br>Care<br>Participants |
| Age [Years]                                             | 2322                         | 61 (52,69)             | 56 (50,64)             | 59 (51,68)                   | 61 (53,69)               | 56 (47,63)             | 59 (51,68)                        |
| Race :                                                  | 2288                         |                        |                        |                              |                          |                        |                                   |
| Black                                                   |                              | 32% ( 262)             | 35% ( 115)             | 33%(377)                     | 30% ( 254)               | 37% ( 116)             | 33%(377)                          |
| White                                                   |                              | 62% ( 503)             | 59% ( 194)             | 61%(697)                     | 64% ( 539)               | 59% ( 184)             | 61%(697)                          |
| Other                                                   |                              | 5% ( 43)               | 7% ( 22)               | 6%(65)                       | 5% ( 45)                 | 4% ( 11)               | 6%(65)                            |
| Sex : Women                                             | 2322                         | 31% ( 252)             | 28% ( 94)              | 30%(346)                     | 26% ( 220)               | 28% ( 90)              | 30%(346)                          |
| Region : US                                             | 2322                         | 88% ( 723)             | 90% ( 303)             | 89%(1026)                    | 88% ( 744)               | 92% ( 292)             | 89%(1026)                         |
| Marital :                                               | 2315                         |                        |                        |                              |                          |                        |                                   |
| Married                                                 |                              | 59% ( 481)             | 53% ( 178)             | 57%(659)                     | 61% ( 513)               | 52% ( 165)             | 58%(678)                          |
| Widowed                                                 |                              | 9% ( 77)               | 8% ( 28)               | 9%(105)                      | 10% ( 87)                | 9% ( 28)               | 10%(115)                          |
| Divorced                                                |                              | 13% ( 106)             | 17% ( 58)              | 14%(164)                     | 14% ( 120)               | 15% ( 47)              | 14%(167)                          |
| Separated                                               |                              | 4% ( 30)               | 5% ( 16)               | 4%(46)                       | 3% ( 25)                 | 4% ( 13)               | 3%(38)                            |
| Single                                                  |                              | 12% ( 95)              | 12% ( 40)              | 12%(135)                     | 9% ( 75)                 | 16% ( 50)              | 11%(125)                          |
| Cohabitate                                              |                              | 3% ( 25)               | 4% ( 14)               | 3%(39)                       | 3% ( 22)                 | 3% ( 9)                | 3%(31)                            |
| Refused                                                 |                              | 0% ( 4)                | 1% ( 3)                | 1%(7)                        | 0% ( 3)                  | 1% ( 3)                | 1%(6)                             |
| Education :                                             | 2271                         |                        |                        |                              |                          |                        |                                   |
| < HS                                                    |                              | 11% ( 90)              | 15% ( 48)              | 12%(138)                     | 11% ( 95)                | 16% ( 50)              | 13%(145)                          |
| HS                                                      |                              | 26% (208)              | 27% ( 89)              | 26%(297)                     | 28% (236)                | 32% (100)              | 29%(336)                          |
| Some College                                            |                              | 27% (213)              | 27% ( 89)              | 27%(302)                     | 28% (229)                | 24% ( 76)              | 27%(305)                          |
| AD                                                      |                              | 9% ( 71)               | 8% ( 27)               | 9%(98)                       | 9% ( 71)                 | 10% ( 31)              | 9%(102)                           |
| BA                                                      |                              | 19% (153)              | 13% ( 43)              | 17%(196)                     | 15% (126)                | 11% ( 34)              | 14%(160)                          |
| Grad School                                             |                              | 8% ( 68)               | 9% ( 30)               | 9%(98)                       | 9% ( 74)                 | 6% ( 20)               | 8%(94)                            |
| Income : > \$25K                                        | 2067                         | 62% ( 460)             | 52% ( 156)             | 59%(616)                     | 62% ( 459)               | 50% ( 144)             | 59%(603)                          |
| BDI-II at Study<br>Entry                                | 2322                         | 6(4,9)                 | 20(16,25)              | 8(5,15)                      | 6(3,9)                   | 20(17,25)              | 8(4,15)                           |
| Peak VO <sub>2</sub> during<br>Treadmill<br>[mL/kg/min] | 2268                         | 15(12,18)              | 14(11,17)              | 14(11,18)                    | 15(12,18)                | 14(11,17)              | 14(12,18)                         |
| Treadmill Test<br>Duration<br>[Minutes]                 | 2301                         | 9.9<br>(7.0,12.0)      | 8.8<br>(6.4,11.4)      | 9.5<br>(6.8,12.0)            | 10.0<br>(7.1,12.7)       | 9.0<br>(6.3,11.6)      | 9.7<br>(7.0,12.2)                 |
| Body Mass Index<br>[Kg/m <sup>2</sup> ]                 | 2316                         | 30 (26,34)             | 31 (27,36)             | 30 (26,35)                   | 29 (26,34)               | 32 (27,37)             | 30 (26,35)                        |
| Diabetes                                                | 2322                         | 32% (261)              | 35% (117)              | 33%(378)                     | 30% (255)                | 36% (115)              | 32%(370)                          |
| Hypertension                                            | 2309                         | 62% (504)              | 61% (207)              | 62%(711)                     | 57% (483)                | 61% (190)              | 58%(673)                          |
| Smoking :                                               | 2311                         |                        |                        |                              |                          |                        |                                   |
| Never                                                   |                              | 40% (323)              | 31% (104)              | 37%(427)                     | 39% (326)                | 35% (111)              | 38%(437)                          |
| Current                                                 |                              | 14% (116)              | 20% (68)               | 16%(184)                     | 16% (133)                | 21% (66)               | 17%(199)                          |
| Quit                                                    |                              | 46% (378)              | 49% (165)              | 47%(543)                     | 46% (384)                | 44% (137)              | 45%(521)                          |
| NYHA Class :                                            | 2322                         | 31% (258)              | 53% (177)              | 38%(435)                     | 32% (269)                | 47% (147)              | 36%(416)                          |
| Class III or IV<br>Angina class :                       | 2319                         |                        |                        |                              |                          |                        |                                   |
| None                                                    |                              | 85% (694)              | 78% (261)              | 83%(955)                     | 87% (735)                | 80% (252)              | 85%(987)                          |
| I                                                       |                              | 8% (63)                | 13% (42)               | 9%(105)                      | 8% (70)                  | 8% (25)                | 8%(95)                            |

|                                                       |      |               |               |               |               |                |               |
|-------------------------------------------------------|------|---------------|---------------|---------------|---------------|----------------|---------------|
| II or greater                                         |      | 8% (64)       | 10% (32)      | 8% (96)       | 5% (42)       | 12% (39)       | 7% (81)       |
| CHF Etiology : Non-Ischemic                           | 2322 | 49% (399)     | 48% (162)     | 48% (561)     | 47% (396)     | 55% (173)      | 49% (569)     |
| LVEF                                                  | 2318 | 25 (20,30)    | 25 (20,30)    | 25 (20,30)    | 25 (20,30)    | 25 (20,30)     | 25 (20,30)    |
| Six Minute Walk Distance [meters]                     | 2271 | 377 (300,442) | 351 (279,420) | 366 (296,436) | 380 (310,440) | 354 (266, )420 | 373 (300,432) |
| High Mitral Valve Regurgitation                       | 2129 | 11% (81)      | 14% (42)      | 12% (123)     | 11% (88)      | 15% (44)       | 12% (132)     |
| Ventricular Conduction :                              | 2263 |               |               |               |               |                |               |
| Normal                                                |      | 44% (352)     | 42% (137)     | 43% (489)     | 44% (360)     | 41% (127)      | 43% (487)     |
| LBBB                                                  |      | 17% (133)     | 16% (52)      | 16% (185)     | 17% (139)     | 17% (53)       | 17% (192)     |
| RBBB                                                  |      | 4% (35)       | 3% (11)       | 4% (46)       | 3% (26)       | 4% (12)        | 3% (38)       |
| IVCD                                                  |      | 11% (89)      | 15% (50)      | 12% (139)     | 12% (99)      | 17% (53)       | 13% (152)     |
| Paced                                                 |      | 24% (196)     | 24% (78)      | 24% (274)     | 24% (199)     | 20% (62)       | 23% (261)     |
| Kansas City Cardiomyopathy Questionnaire Score (KCCQ) | 2322 | 75 (61,86)    | 48 (37,62)    | 68 (50,82)    | 76 (61,88)    | 48 (36,58)     | 69 (52,84)    |
| Weber Score 1                                         | 2268 | 13% (108)     | 10% (32)      | 12% (140)     | 16% (130)     | 11% (35)       | 15% (165)     |
| 2                                                     |      | 25% (204)     | 21% (68)      | 24% (272)     | 22% (183)     | 24% (73)       | 23% (256)     |
| 3                                                     |      | 47% (379)     | 52% (170)     | 49% (549)     | 49% (406)     | 46% (141)      | 48% (547)     |
| 4                                                     |      | 14% (113)     | 17% (57)      | 15% (170)     | 13% (109)     | 19% (60)       | 15% (169)     |
| Blood Urea Nitrogen                                   | 2020 | 21 (16,28)    | 18 (15,28)    | 20 (15,28)    | 19 (15,28)    | 21 (15,29)     | 21 (15,28)    |
| Beta Blockade Dose [mg/day]                           | 2302 | 25 (13,50)    | 50 (13,50)    | 38 (13,50)    | 28 (13,50)    | 25 (13,50)     | 25 (13,50)    |
| Loop Diuretic Dose [mg/day]                           | 2289 | 40 (1,80)     | 40 (20,80)    | 40 (20,80)    | 40 (20,80)    | 40 (20,80)     | 40 (20,80)    |
| SSRI                                                  | 2322 | 9% (75)       | 22% (75)      | 13% (150)     | 11% (93)      | 23% (73)       | 14% (166)     |
| Antidepressant Tricyclic                              | 2322 | 3% (22)       | 4% (13)       | 3% (35)       | 1% (12)       | 5% (17)        | 2% (29)       |
| Antidepressant Other                                  | 2322 | 4% (34)       | 9% (29)       | 5% (63)       | 5% (44)       | 12% (39)       | 7% (83)       |
| Antidepressant                                        |      |               |               |               |               |                |               |

Note: Values are median (25<sup>th</sup>, 75<sup>th</sup> percentile) for continuous variables and % (N) of category

BDI-II: Beck Depression Inventory II (range 0-63), with higher scores indicating greater depressive symptoms

NYHA: New York Heart Association

LVEF: Left ventricular ejection fraction

KCCQ: The Kansas City Cardiomyopathy Questionnaire is a 23-item scale in which the range of scores is 0-100 with higher scores representing better health

Weber score ranges from 1 to 4, with lower scores representing higher cardiopulmonary fitness (peak VO<sub>2</sub>).

**eFigure.** Association Between Change in BDI-II From Baseline to 3 Months and All-Cause Hospitalization or Death After the 3-Month Time Point

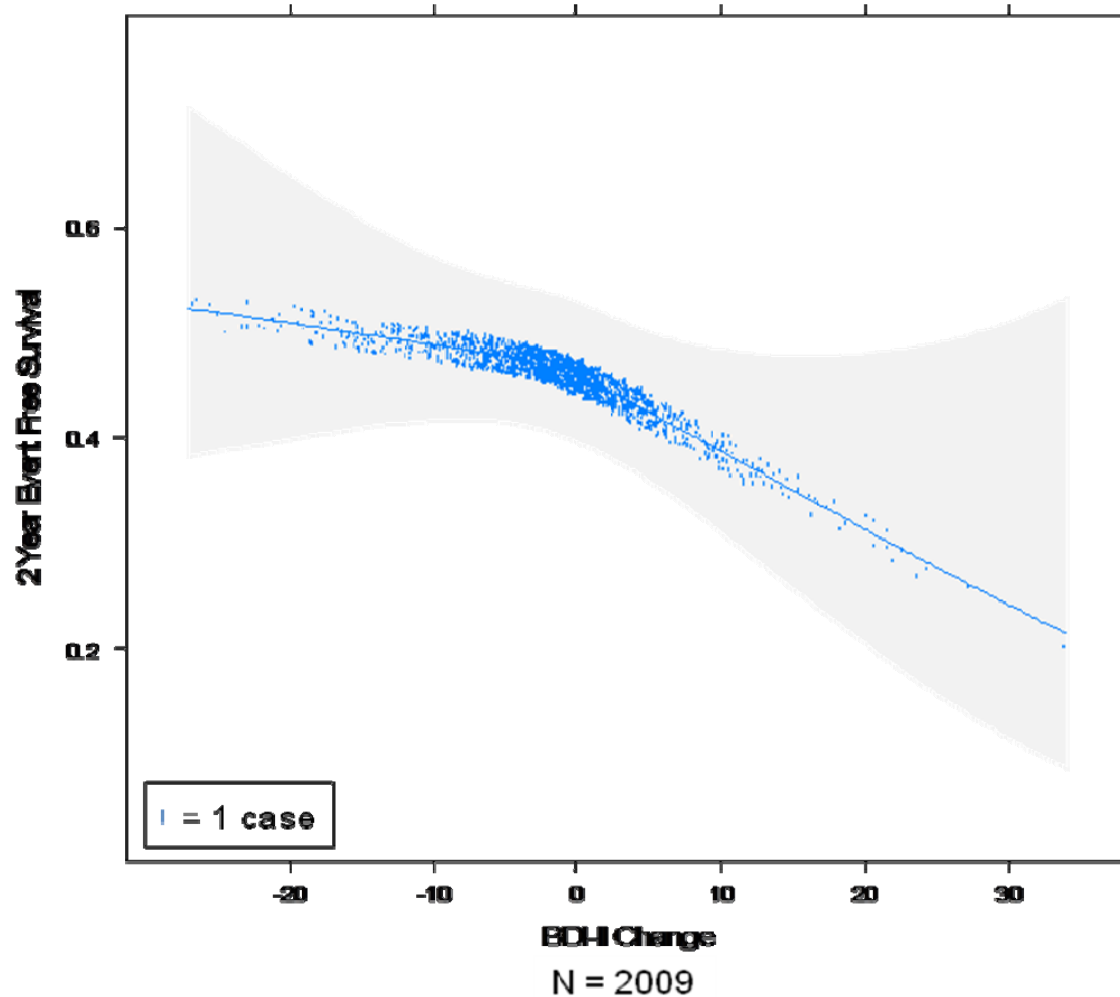

Change in BDI-II was modeled using a 3-knot restricted cubic spline in the Cox regression model described in the text. Shaded region represents 95% confidence interval. Tick marks display data density with respect to change in BDI-II scores. Tick marks are drawn at actual BDI-II change values for each patient (case) along the fitted regression line and are jittered vertically along the fitted line to display density more clearly. Only events that occurred after the end of the 3-month treatment period were included in the analysis. If a participant experienced a hospitalization during the 3-month treatment period, we ignored that event and used the first event after the conclusion of the treatment period. Based on prior work (see Sherwood et al., 2011 reference #32), we expected that the association between change in BDI-II and events would be strongest among those participants with worsening depressive symptoms. We therefore examined two local HRs along the fitted curve, using the predicted event probability generated by the Cox model: one HR compared a typical participant who improved by 10 points on the BDI-II to a participant with a change score of 0; a second compared a participant with a 10 point worsening on the BDI-II compared to a participant with a change score of 0. The HR for an improvement of 10 points on the BDI-II compared to a change of 0 was 0.92, but the confidence interval contained 1.0 (95% CI= 0.79, 1.06); the HR for BDI-II worsening by 10 points compared to a change of 0 was 1.21 (95% CI= 1.03, 1.43).
